# Supplementary material
Source: MDPI journal article supplement (https://www.mdpi.com/2311-7524/8/12/1162)
Supplement: s1 [file s1]

Table primer information for qRT-PCR

| Name         | Gene ID                | Forward primer         | Forward primer           |
|--------------|------------------------|------------------------|--------------------------|
| <i>ZEP</i>   | TRINITY_DN56325_c0_g2  | AAGGTTTTGGTAGGCTGTG    | TGGAAATGTGGTGAGGC        |
| <i>NCED</i>  | TRINITY_DN51946_c0_g3  | CGGGAGGTATGATTTTCG     | TTGTGGAGGATGTTGTAGC      |
| <i>PYL8</i>  | TRINITY_DN51833_c1_g4  | CCGCCCTCATCAAGCACA     | CCACGCACCTGCTCACGA       |
| <i>PP2C</i>  | TRINITY_DN52949_c1_g9  | GAGGTGCTCGGTTTACTG     | CCTATGTTCTCGGACGC        |
| <i>SnRK</i>  | TRINITY_DN49612_c1_g8  | TTCAATGGGTTGGAGGA      | CTGCGATGTAGAAATAAGC      |
| <i>CDPK</i>  | TRINITY_DN52389_c4_g4  | ACTGAAGCAATGAAGGACTC   | TGGAAGCAGCAGCAAAT        |
| <i>Cal</i>   | TRINITY_DN55578_c2_g11 | AGGAGCTTGGAAGTGTGA     | GTTGAGGAACTCTGGGAAA      |
| <i>CBL</i>   | TRINITY_DN52265_c2_g7  | TACAAGCAGGCTAACGG      | ATAGGGCTAACTGGAAC        |
| <i>PAL</i>   | TRINITY_DN56523_c2_g13 | TGGAAGTACGGGTTCAAGG    | GCCCAACGAGTTCACAT        |
| <i>C4H</i>   | TRINITY_DN53510_c0_g1  | CAAGCGGTCATCAAAGA      | CGGGACATAGCGGAAGT        |
| <i>4CL</i>   | TRINITY_DN51236_c2_g6  | ATTCAAGGGCTTTCAGGTGC   | TGCTTCATCGGTGATTTTCG     |
| <i>CHI</i>   | TRINITY_DN47316_c0_g1  | CCTCTTCCATCATTCCG      | CGCCAGGCTCTGTTTAG        |
| <i>IFR</i>   | TRINITY_DN56606_c0_g4  | CCTTCGTGTCCTCCAAT      | TCGTCCACCGCTCTAAT        |
| <i>GR</i>    | TRINITY_DN51826_c2_g3  | ACCAAGCAAACCTGACT      | ACCCTTTCCTTCCTCTA        |
| <i>LEA14</i> | TRINITY_DN58423_c3_g1  | GTGGCGTTCGTATTGCT      | GTGGTCTGTTCCCTCCC        |
| <i>P5CR</i>  | TRINITY_DN56094_c2_g1  | AAGATGAAGAGCGTGTAGCC   | GTTCCAGCAGGTGAAGTAA      |
| <i>VP</i>    | TRINITY_DN60175_c1_g2  | GATAGCCCTCCCTTCTACCTT  | CCAATCCCGCCCATAAAC       |
| <i>CMO</i>   | TRINITY_DN56964_c0_g4  | TGAGCAAATCAAGAATG      | TGTGAAAAGCACGAAGT        |
| <i>BADH</i>  | TRINITY_DN54486_c0_g1  | TAGCATCCCATCCTCAT      | GTCCAAAAGCACCCAAA        |
| <i>HSP70</i> | TRINITY_DN59746_c1_g9  | ATCTCGGCACCACCTAC      | AGCATCGCTGAATCTCC        |
| <i>EF1-β</i> | TRINITY_DN53309_c0_g3  | ATCTTCTGACCAGGAGTTACAT | TACCACCTAGCAACATTGA<br>C |
