# Supplementary material
Source: MDPI journal article supplement (https://www.mdpi.com/2311-7524/8/12/1162)
Supplement: s1 [file s1]

GO enrichment in DEGs at different drought stress

| Comparison | GO ID      | GO Term                                                     | DEGs number | <i>p</i> value | Rich factor |
|------------|------------|-------------------------------------------------------------|-------------|----------------|-------------|
| MDW        | GO:0000786 | nucleosome                                                  | 14          | 1.35E-13       | 0.27        |
|            | GO:0015250 | water channel activity                                      | 13          | 3.52E-13       | 0.30        |
|            | GO:0005576 | extracellular region                                        | 73          | 3.88E-13       | 0.04        |
|            | GO:0015254 | glycerol channel activity                                   | 12          | 2.34E-12       | 0.30        |
|            | GO:0009992 | cellular water homeostasis                                  | 12          | 3.26E-12       | 0.29        |
|            | GO:0034220 | ion transmembrane transport                                 | 13          | 1.19E-10       | 0.19        |
|            | GO:0009809 | lignin biosynthetic process                                 | 16          | 1.66E-10       | 0.14        |
|            | GO:0005618 | cell wall                                                   | 31          | 2.00E-09       | 0.06        |
|            | GO:0042807 | central vacuole                                             | 6           | 4.05E-08       | 0.46        |
|            | GO:1901430 | positive regulation of syringal lignin biosynthetic process | 6           | 6.98E-08       | 0.43        |
|            |            |                                                             | 4           |                |             |
| MLW        | GO:0043680 | filiform apparatus                                          | 4           | 5.98E-08       | 0.44        |
|            | GO:0010483 | pollen tube reception                                       | 4           | 4.67E-07       | 0.29        |
|            | GO:0046910 | pectinesterase inhibitor activity                           | 6           | 1.35E-06       | 0.08        |
|            | GO:0007338 | single fertilization                                        | 4           | 1.41E-06       | 0.22        |
|            | GO:0030599 | pectinesterase activity                                     | 6           | 2.32E-06       | 0.08        |
|            | GO:0031492 | nucleosomal DNA binding                                     | 4           | 7.80E-06       | 0.15        |
|            | GO:0030308 | negative regulation of cell growth                          | 4           | 2.26E-05       | 0.11        |
|            | GO:0050832 | defense response to fungus                                  | 7           | 2.30E-05       | 0.04        |
|            | GO:0071944 | cell periphery                                              | 6           | 2.53E-05       | 0.05        |
|            | GO:0009873 | ethylene-activated signaling pathway                        | 7           | 4.56E-05       | 0.04        |
